# Supplementary material for: WDR41 supports lysosomal response to changes in amino acid availability
Source: PubMed Central journal article supplement — Mol Biol Cell. 2018 Sep 1;29(18):2213–27. doi: 10.1091/mbc.E17-12-0703 (PMC6249801; doi:10.1091/mbc.e17-12-0703), 2018-09-01
Supplement: mbc-29-2213-s001.pdf [file mbc-29-2213-s001.pdf]

# Supplemental Materials

*Molecular Biology of the Cell*

Amick et al.

Supplemental Data for:

**WDR41 supports lysosomal response to changes in amino acid availability**

Joseph Amick<sup>1,2</sup>, Arun Kumar Tharkeshwar<sup>1,2</sup>, Catherine Amaya<sup>1,2</sup> and Shawn M. Ferguson<sup>1,2\*</sup>

Department of Cell Biology<sup>1</sup>, Program in Cellular Neuroscience,  
Neurodegeneration and Repair<sup>2</sup>, Yale University School of Medicine, New  
Haven, CT, 06510

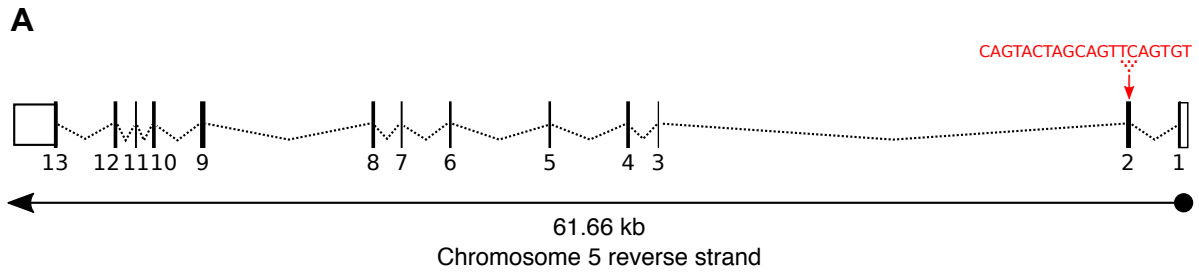

**B**

| Cell line                       | Mutation                                                                                                 |
|---------------------------------|----------------------------------------------------------------------------------------------------------|
| WDR41 KO 2xHA-C9orf72 HEK293 FT | 2 base pair deletion<br>31 base pair insertion<br>4 base pair deletion                                   |
| WDR41 KO HeLa                   | 2 base pair deletion (CT)<br>2 base pair deletion (AC)<br>13 base pair deletion<br>10 base pair deletion |

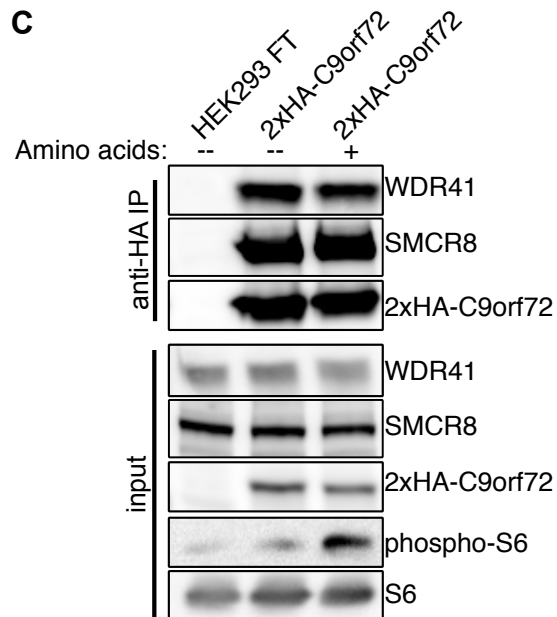

**Supplemental Figure 1. Characterization of WDR41 knockout cell lines (A)** Diagram of the WDR41 locus indicating the target site in exon 2 and sequence of the Cas9 guide RNA used to target WDR41 in red. **(B)** Summary of the insertions and deletions (indels) that were identified by sequencing of the targeted locus in the WDR41 KO cell lines. Consistent with loss of the WDR41 protein, all of the indels detected in our KO cell lines yield to frameshift mutations and premature stop codons. **(C)** Anti-HA immunoprecipitations from 2xHA-C9orf72 cells harvested under starvation and amino acid-fed conditions revealed similar levels of WDR41 and SMCR8 interactions.

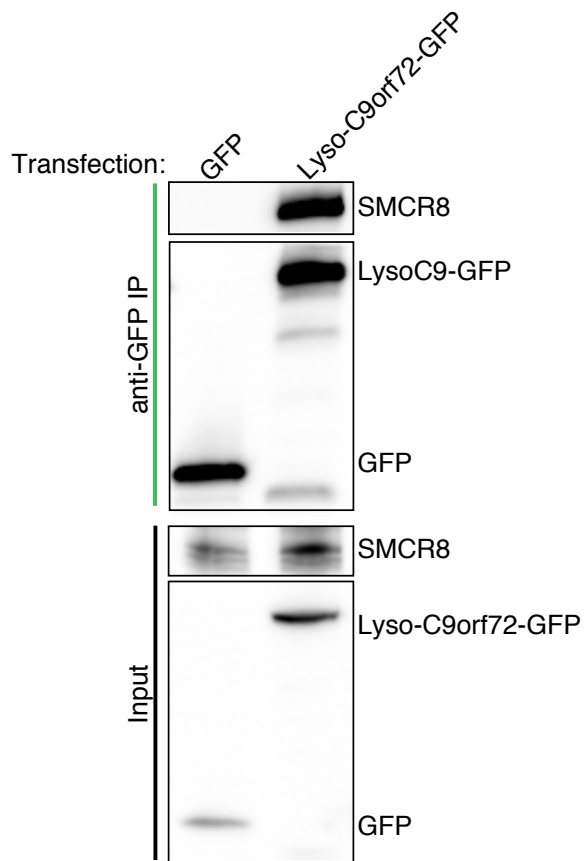

**Supplemental Figure 2. Lyso-C9orf72-GFP interacts with SMCR8.** Lysates from WDR41 knockout HeLa cells stably expressing Lyso-C9orf72-GFP were anti-GFP immunoprecipitated and subjected to immunoblotting for GFP and SMCR8. Cells transfected with GFP served as a negative control.

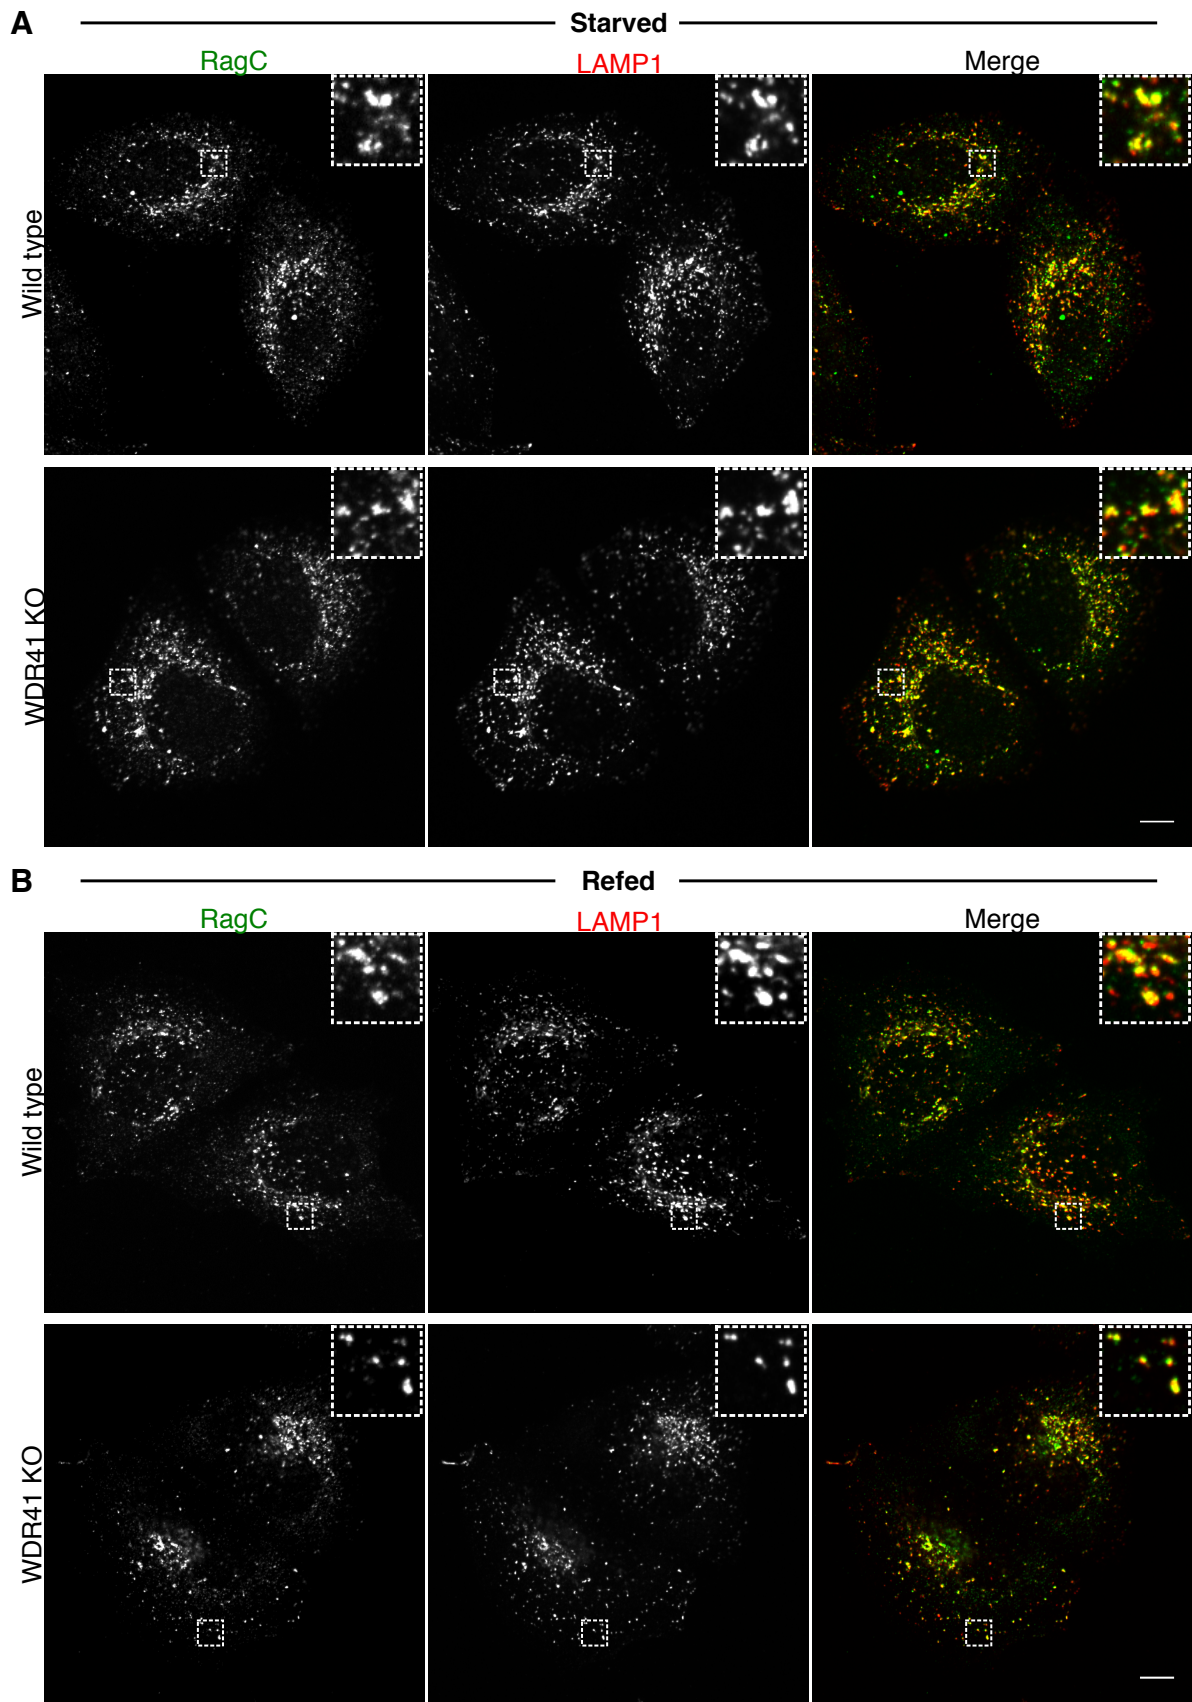

**Supplemental Figure 3. Lysosomal localization of RagC does not require WDR41.** Immunofluorescence analysis of RagC and LAMP1 localization in wild type and WDR41 knockout HeLa cells under **(A)** starved conditions (1.5 h) and **(B)** amino acid refed conditions (15 min). Scale bar, 10 $\mu$ m.

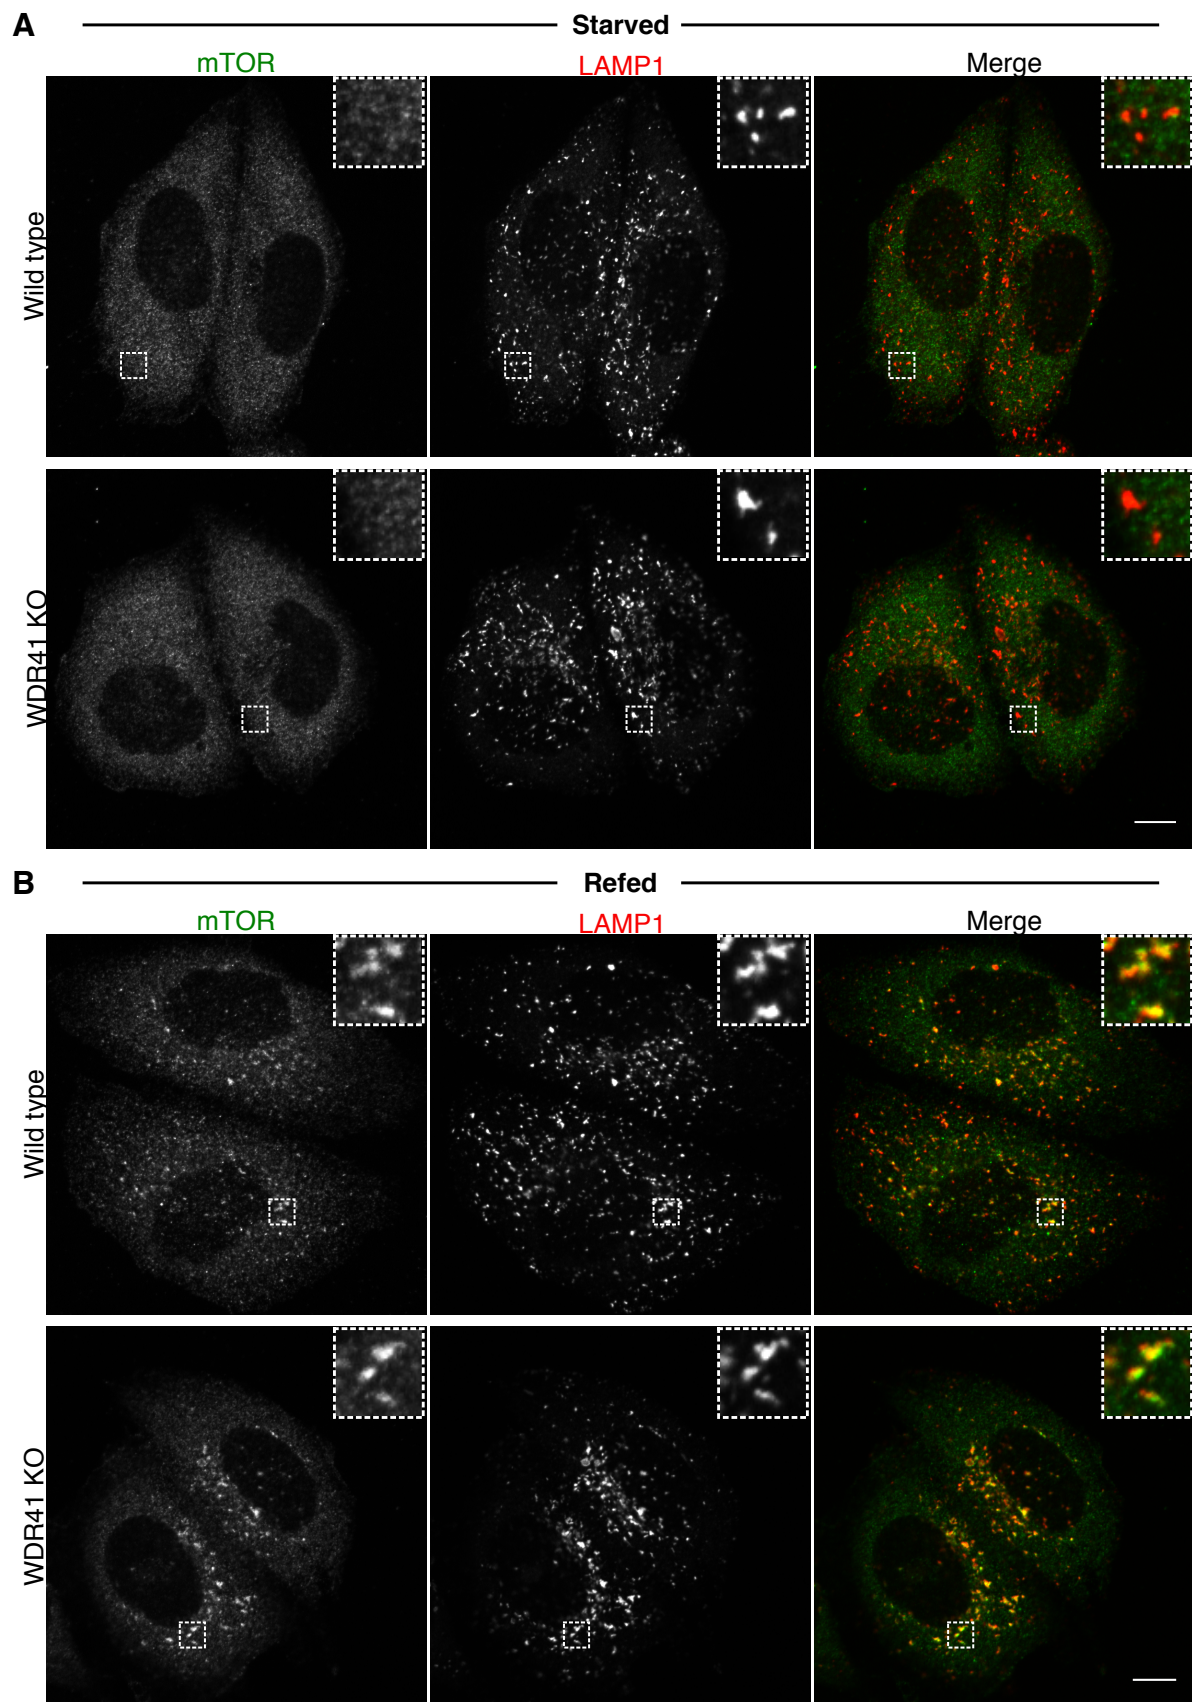

**Supplemental Figure 4. mTOR subcellular localization shows normal responses to starvation and amino acid re-feeding in WDR41 knockout cells.** Immunofluorescence analysis of mTOR and LAMP1 localization in wild type and WDR41 knockout HeLa cells under starved conditions (1.5 h) **(A)** and amino acid refed conditions (15 min) **(B)**. Scale bar, 10 $\mu$ m.

**Supplemental Table 1: PCR primers and other oligo sequences**

| Target                     | Sequence                                                                | Notes                                                                                        |
|----------------------------|-------------------------------------------------------------------------|----------------------------------------------------------------------------------------------|
| WDR41 forward              | 5' - gtcgacggtaccgcgggcccACCATG<br>GGTTGAACCATGTTGCGATGGC<br>TGATC - 3' | WDR41 forward primer with<br>uORF for insertion into pLVX<br>puro vector                     |
| WDR41 reverse              | 5' - atctagagtgcggggatcccTTAG<br>ACAGCAAGGTATAAGTCACC - 3'              | Reverse primer for insertion of<br>untagged WDR41 into pLVX<br>puro vector                   |
| WDR41-HA reverse           | 5' - atctagagtgcggggatcccTTAGAC<br>AGCAAGGTATAAGTCACC - 3'              | Reverse primer for insertion of<br>WDR41-HA into pLVX puro                                   |
| Lyso-C9orf72-GFP forward   | 5' – gtcgacggtaccgcgggcccACCAT<br>GGGGTGCTGCTAC – 3'                    | forward primer for insertion of<br>LAMTOR1(1-39)-C9orf72-GFP<br>fusion into pLVX puro vector |
| Lyso-C9orf72-GFP reverse   | 5' - atctagagtgcggggatcccTACTTG<br>TACAGCTCGTCCATG - 3'                 | reverse primer for insertion of<br>LAMTOR1(1-39)-C9orf72-GFP<br>fusion into pLVX puro vector |
| WDR41 genomic sense #1     | 5' - atcatctcattattttgtgg - 3'                                          | sequencing genomic DNA of<br>WDR41-2xHA CRISPR knockin                                       |
| WDR41 genomic antisense #1 | 5'-TCAAAGTCAAATGGAAAAAC-3'                                              | sequencing genomic DNA of<br>WDR41-2xHA CRISPR knockin                                       |
| WDR41 genomic sense #2     | 5'-AACTTGCAGTTATTTAGTTG-3'                                              | sequencing genomic DNA of<br>WDR41 knockout cells                                            |
| WDR41 genomic antisense #2 | 5' - CGAGATGCAGAGGCCAATTT<br>- 3'                                       | sequencing genomic DNA of<br>WDR41 knockout cells                                            |
| WDR41 gRNA sense           | 5' - caccgCAGTACTAGCAGTTCA<br>GTGT - 3'                                 | cloning of guide RNA into px459<br>vector                                                    |
| WDR41 gRNA antisense       | 5' - aaacACACTGAACTGCTAGTA<br>CTGc - 3'                                 | cloning of guide RNA into px459<br>vector                                                    |
| RB1CC1 gRNA #1 sense       | 5' - caccgTATGTATTTCTGGTTAA<br>CAC - 3'                                 | cloning of guide RNA into px459<br>vector                                                    |
| RB1CC1 gRNA #1 antisense   | 5' - aaacGTGTTAACCAGAAATAC<br>ATAc - 3'                                 | cloning of guide RNA into px459<br>vector                                                    |
| RB1CC1 gRNA #2 sense       | 5' - caccgCAAGATTGCTATTCAAC<br>ACC - 3'                                 | cloning of guide RNA into px459<br>vector                                                    |
| RB1CC1 gRNA #2 antisense   | 5' - aaacGGTGTGAATAGCAATC<br>TTGc - 3'                                  | cloning of guide RNA into px459<br>vector                                                    |

**Supplemental Table 2: Sequences used for CRISPR knockin of 2xHA epitope tag into WDR41 locus**

| Gene  | Sequence                                                                                                                                                                                              | Note                                                     |
|-------|-------------------------------------------------------------------------------------------------------------------------------------------------------------------------------------------------------|----------------------------------------------------------|
| WDR41 | AUUCCUUAACUAGACAGCA                                                                                                                                                                                   | guide RNA for knockin of tag                             |
| WDR41 | ATTATTTTGTGGAAAAATGGAGAGCGAG<br>AATCTGGATTGCGCAGTTTAAGATTATT<br>TCAAAAATTAGAGGAGAATGGTGACTTA<br>TATCTTGCTGTCtaccatacgatgtccagattac<br>gcttatccctatgacgtcccggactatgcaTAGTTTAA<br>GGAATTAATAACACATGCATG | ssDNA repair template for<br>knockin of 2xHA epitope tag |



**Supplemental Table 3: Summary of antibodies used in this study**

| <b>Antibody</b>                               | <b>Source</b>             | <b>Catalog/clone number</b> |
|-----------------------------------------------|---------------------------|-----------------------------|
| Actin                                         | Abcam                     | ab8224                      |
| C9orf72                                       | Proteintech               | 22637-1-AP                  |
| Cathepsin D                                   | R&D Systems               | AF1014                      |
| Calnexin                                      | Cell Signaling Technology | 2679 (C5C9)                 |
| Donkey anti-Goat,<br>Alexa Fluor 488          | Thermo Fisher Scientific  | A-11058                     |
| Donkey anti-Rabbit,<br>Alexa Fluor 594        | Thermo Fisher Scientific  | A-21206                     |
| EEA1                                          | Thermo Fisher Scientific  | PA1-063A                    |
| FLCN                                          | Cell Signaling Technology | 3697                        |
| FNIP1                                         | Epitomics                 | EPNCIR107                   |
| GM130                                         | BD Biosciences            | 610822                      |
| GFP-HRP                                       | Rockland                  | 600-103-215                 |
| Goat Anti-Mouse IgG                           | Jackson ImmunoResearch    | 115-005-146                 |
| HA                                            | Cell Signaling Technology | 2367                        |
| HA-Peroxidase (3F10)                          | Roche                     | 12 013 819 001              |
| LAMP1                                         | Cell Signaling Technology | 9091                        |
| LAMP1                                         | University of Iowa DSHB   | H4A3                        |
| LAMTOR1                                       | Cell Signaling Technology | 8975 (D11H6)                |
| Lamin A/C                                     | Santa Cruz                | SC-20681 (H-110)            |
| LC3                                           | MBL International         | PM036                       |
| phospho-p70 S6<br>Kinase (Thr389)             | Cell Signaling Technology | 9234                        |
| phospho-S6 Ribosomal<br>protein (Ser 235/236) | Cell Signaling Technology | 4858                        |
| p70 S6 Kinase                                 | Cell Signaling Technology | 9202                        |
| RB1CC1                                        | Proteintech               | 10043-2-AP                  |
| Rab7A                                         | Sigma-Aldrich             | HPA006964                   |
| SMCR8                                         | Bethyl Laboratories       | A304-694A                   |
| S6                                            | Cell Signaling Technology | 2217                        |
| Tubulin                                       | Sigma-Aldrich             | T5168                       |
| WDR41                                         | Novus Biologicals         | NBP1-83812                  |
